# Supplementary material for: Insecticidal Activity of a Vip3Ab1 Chimera Is Conferred by Improved Protein Stability in the Midgut of Spodoptera eridania
Source: MDPI journal article supplement (doi:10.3390/toxins11050276), 2019-05-16
Supplement: s1 [file s1]

# Supplementary Materials: Insecticidal activity of a Vip3Ab1 chimera is conferred by improved protein stability in the midgut of *Spodoptera eridania*

Andrew J. Bowling, Megan S. Sopko, Sek Yee Tan, Cory M. Larsen, Heather E. Pence and Marc D. Zack

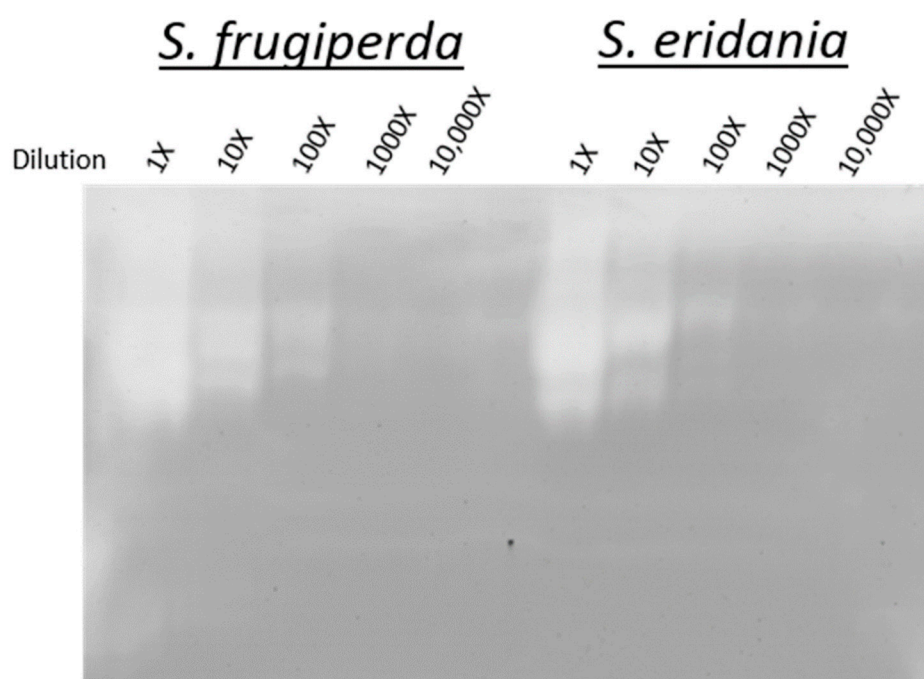

**Figure S1.** The proteases present in *S. frugiperda* and *S. eridania* midgut fluids were analyzed on a casein zymogram. Ten-fold serial dilutions were loaded onto the gel from 1X to 10,000X. Both species show similar patterns of negatively stained bands, which represent proteases.

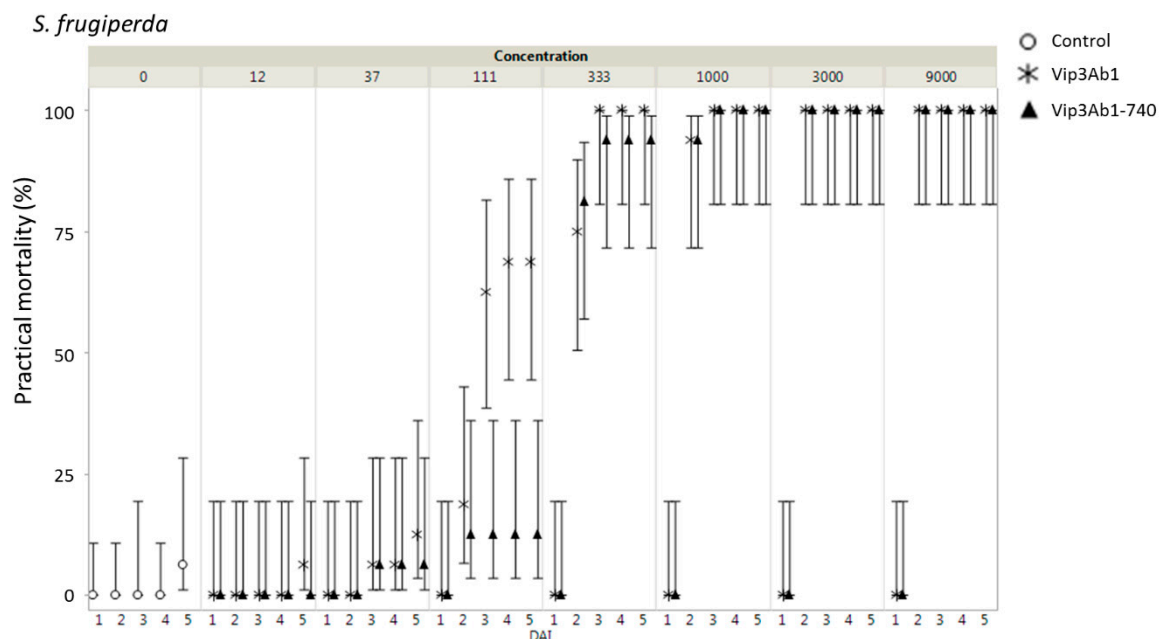

**Figure S2.** Range finding bioassay for *S. frugiperda*. Bioassays were performed using 16 insects at 7 different concentration of Vip3Ab1 or Vip3Ab1-740. The number of dead and moribund insects was recorded daily for 5 days after infestation (DAI). Percent practical mortality and associated 95% confidence intervals are shown.

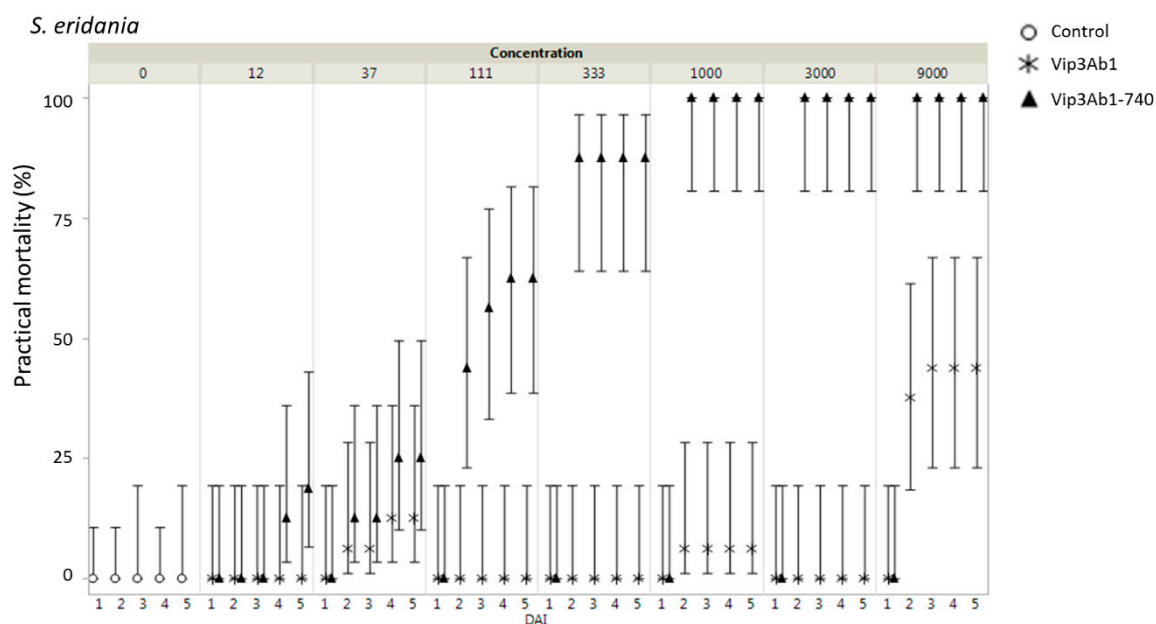

**Figure S3.** Range finding bioassay for *S. eridania*. Bioassays were performed using 16 insects at 7 different concentration of Vip3Ab1 or Vip3Ab1-740. The number of dead and moribund insects was recorded daily for 5 days after infestation (DAI). Percent practical mortality and associated 95% confidence intervals are shown.
